# Supplementary material for: Quantification of selenium-tagged proteins in human plasma using species-unspecific isotope dilution ICP-DRC-qMS coupled on-line with anion exchange chromatography
Source: Royal Society of Chemistry journal article supplement (doi:10.1039/b804935a), 2008-01-01
Supplement: b804935a.pdf [file b804935a.pdf]

## Electronic supplementary information

### Quantification of selenium-tagged proteins in human plasma using species-unspecific isotope dilution ICP-DRC-*q*MS coupled on-line with anion exchange chromatography

Ming Xu,<sup>a</sup> Limin Yang<sup>a</sup> and Qiuquan Wang<sup>\*,a,b</sup>

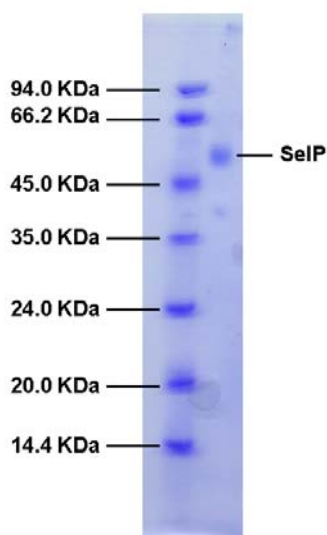

**Figure S1.** Sodium dodecyl sulfate-polyacrylamide gel electrophoresis of purified SelP.

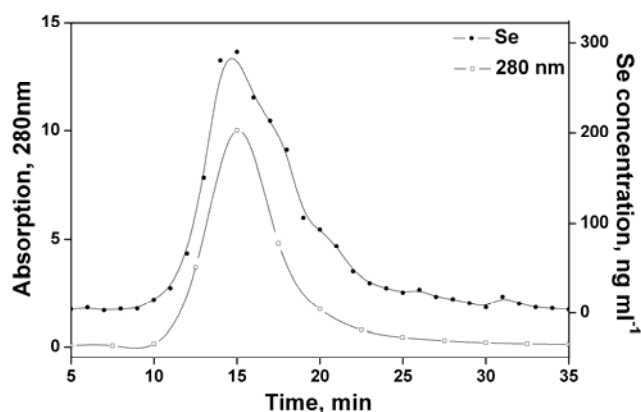

**Figure S2.** The fraction of SelP purified by affinity chromatography monitored using UV (280nm) and ICP-DRC-*q*MS (<sup>80</sup>Se).

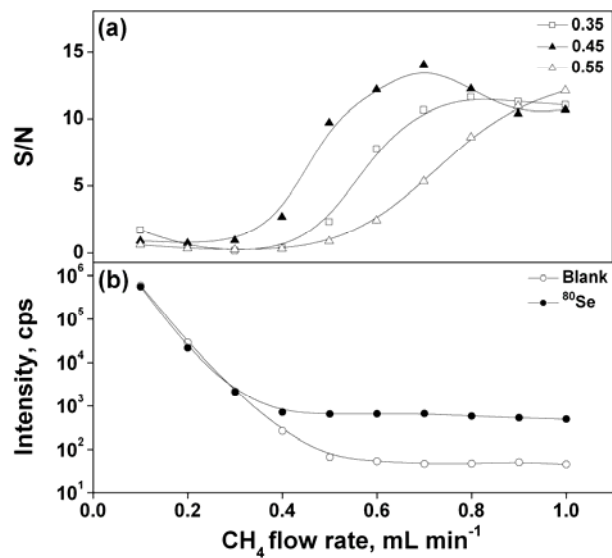

**Figure S3.** Effect of CH<sub>4</sub> flow rate on (a) S/N under different R<sub>pq</sub> values and (b) <sup>80</sup>Se signal intensity of selenium standard solution (10 ng mL<sup>-1</sup>) and blank solution at R<sub>pq</sub> = 0.45.

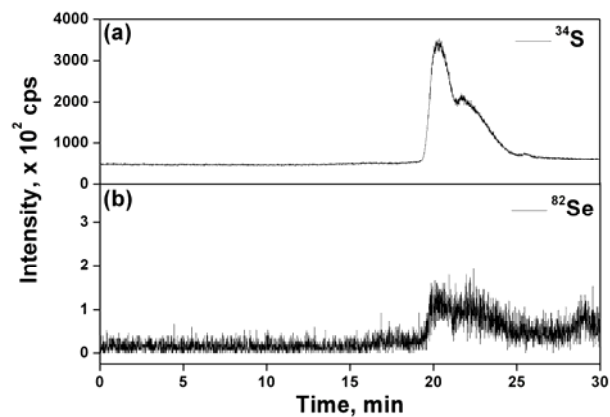

**Figure S4.** Chromatogram of human serum albumin economically available monitored using <sup>34</sup>S and <sup>82</sup>Se by AEC/ICP-DRC-*q*MS.

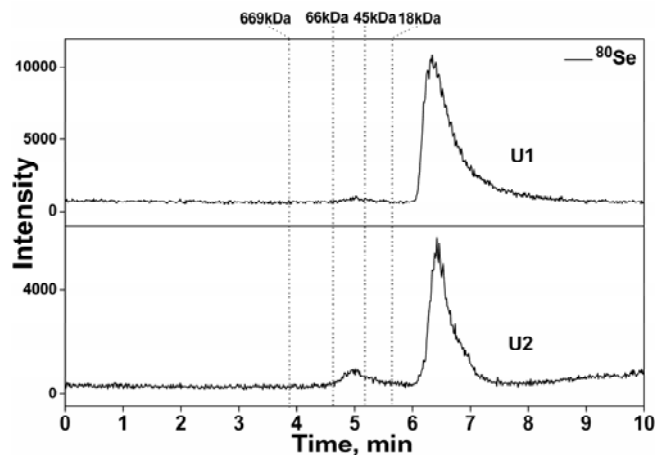

**Figure S5.** Chromatogram of U1 and U2 analyzed by SEC/ICP-DRC-*q*MS. Mobile phase was ultra-pure water and the flow rate was  $0.5 \text{ mL min}^{-1}$ .
